# Supplementary material for: Redox/pH-Responsive 2-in-1 Chimeric Nanoparticles for the Co-Delivery of Doxorubicin and siRNA
Source: MDPI journal article supplement (doi:10.3390/polym13244362), 2021-12-13
Supplement: s1 [file s1]

# Supplementary Material

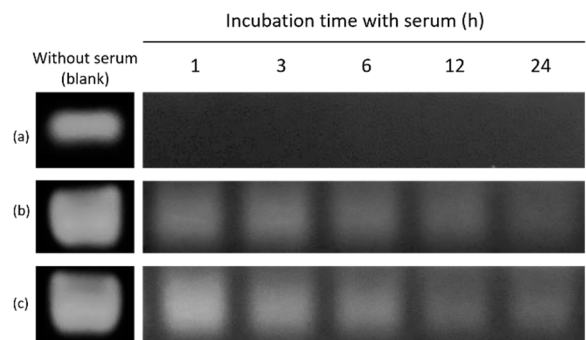

**Figure S1.** Serum stability of (a) naked siRNA, (b) CaP/siRNA and (c) SH-HA-Dopa-CaP/siRNA.

**Table S1.** Zeta potential of the NPs.

| Sample               | Zeta potential (mV) |
|----------------------|---------------------|
| NOCC/Dox/HA-SH       | 21.7 ± 3.5          |
| SH-HA-Dopa-CaP/siRNA | -7.3 ± 10.4         |
| Dox/siRNA HNP        | 15.9 ± 5.4          |

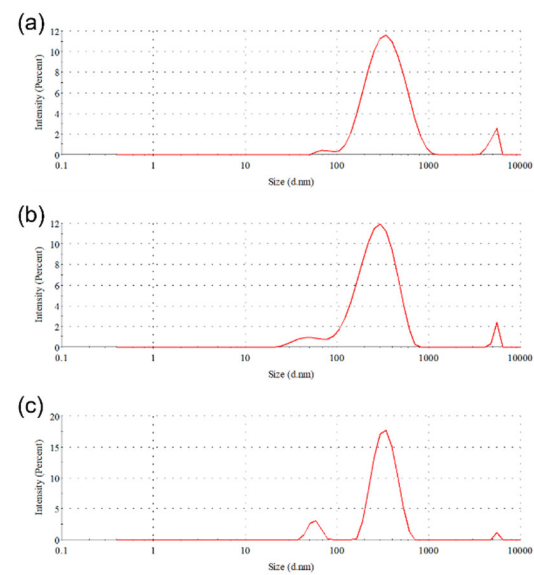

**Figure S2.** The hydrodynamic diameter distributions of (a) NOCC/Dox/HA-SH, (b) SH-HA-Dopa-CaP/siRNA and (c) Dox/siRNA 2-in-1 chimeric NPs at the medium of pH 5.0 with 10 mM GSH by DLS measurements.
